# Supplementary material
Source: publisher figshare collection journal article supplement (https://f1000.figshare.com/ndownloader/files/480233)
Supplement: Supplementary file 1 [file 480233]

## Sheet: Sheet1
Client Sample Name	Species	# genes detected	total genes searched	% detected	# of nonzero entries	Median count	75th perc count	max count	max count transcript	total clusters (Mil)	% transcriptome mapped	%(G+C) aligned	Corresponding FASTQ filenames
DIV-8_1	mm9	17123	29209	58.62	19356	198.17	1012	312009	Eef1a1	28.859	88.37	50.32	DIV-8.1F, DIV-8.1R
DIV-8_2	mm9	17209	29209	58.92	19452	205.05	1073.06	324713	Eef1a1	30.704	88.36	50.57	DIV-8.2F, DIV-8.2R
DIV-8_3	mm9	17206	29209	58.91	19430	203.485	1061.72	338758	Eef1a1	30.43	88.71	50.3	DIV-8.3F, DIV-8.3R
DIV-8_4	mm9	17138	29209	58.67	19439	197	1066	411790	Eef1a1	30.61	90.22	50.58	DIV-8.4F, DIV-8.4R
DIV-4_1	mm9	16579	29209	56.76	18893	184.79	860	309351	Eef1a1	24.075	86.73	44.73	DIV-4.1F, DIV-4.1R
DIV-4_2	mm9	16539	29209	56.62	18819	185.92	864.01	307457	Eef1a1	24.252	86.59	44.65	DIV-4.2F, DIV-4.2R
DIV-4_3	mm9	16796	29209	57.5	19034	207	997.23	356928	Eef1a1	27.804	86.34	44.49	DIV-4.3F, DIV-4.3R
DIV0_1	mm9	17487	29209	59.87	19544	319	1345.96	335436	Eef1a1	32.229	86.35	44.45	DIV0.1F, DIV0.1R
DIV0_2	mm9	17592	29209	60.23	19653	324	1382.69	355546	Eef1a1	33.554	86.46	44.82	DIV0.2F, DIV0.2R
DIV0_3	mm9	17870	29209	61.18	19967	337.31	1535	370577	Eef1a1	38.534	86.99	45.11	DIV0.3F, DIV0.3R
DIV1_1	mm9	17543	29209	60.06	19702	374.945	1627.88	443827	Igf2	41.482	84.81	44.78	DIV1.1F, DIV1.1R
DIV1_2	mm9	17562	29209	60.13	19687	381.64	1650.04	458239	Igf2	42.137	84.57	44	DIV1.2F, DIV1.2R
DIV1_3	mm9	16942	29209	58	19148	279	1125.98	310951	Igf2	27.75	84.68	47.27	DIV1.3F, DIV1.3R
DIV1_4	mm9	17115	29209	58.59	19327	301.6	1247	318717	Igf2	30.908	85.08	47.05	DIV1.4F, DIV1.4R
DIV7_1	mm9	17536	29209	60.04	19802	318.46	1410.19	290627	DQ539915	36.314	84.24	49.86	DIV7.1F, DIV7.1R
DIV7_2	mm9	17495	29209	59.9	19690	313	1344.36	260739	DQ539915	33.835	84.54	50.03	DIV7.2F, DIV7.2R
DIV7_3	mm9	17661	29209	60.46	19810	337.115	1466	276698	DQ539915	37.487	83.97	50.06	DIV7.3F, DIV7.3R
DIV7_4	mm9	17608	29209	60.28	19808	320.095	1408.96	294555	DQ539915	35.857	84.41	50.01	DIV7.4F, DIV7.4R
DIV7_5	mm9	17663	29209	60.47	19854	341.935	1493	299970	DQ539915	38.487	84.31	50.53	DIV7.5F, DIV7.5R
DIV16_1	mm9	16780	29209	57.45	18990	270	1185.96	494249	DQ539915	30.295	83.66	50.02	DIV16.1F, DIV16.1R
DIV16_2	mm9	16485	29209	56.44	18757	240	1073.82	401324	DQ539915	27.177	83.76	49.75	DIV16.2F, DIV16.2R
DIV16_3	mm9	16751	29209	57.35	18918	274.855	1239	490801	DQ539915	31.697	83.58	49.65	DIV16.3F, DIV16.3R
DIV16_4	mm9	16516	29209	56.54	18796	250	1107	421460	DQ539915	27.704	84.8	50.02	DIV16.4F, DIV16.4R
DIV21_1	mm9	16274	29209	55.72	18602	244	1099	448889	DQ539915	27.218	83.99	50.07	DIV21.1F, DIV21.1R
DIV21_2	mm9	16472	29209	56.39	18686	271.745	1220	531203	DQ539915	30.106	84.98	49.86	DIV21.2F, DIV21.2R
DIV21_3	mm9	16417	29209	56.21	18642	275	1248.02	602830	DQ539915	30.61	85.18	49.8	DIV21.3F, DIV21.3R
DIV21_4	mm9	16371	29209	56.05	18592	277.06	1245	636812	DQ539915	30.972	83.62	49.52	DIV21.4F, DIV21.4R
DIV28_1	mm9	16708	29209	57.2	18913	278.44	1206	601360	DQ539915	29.865	83.93	49.84	DIV28.1F, DIV28.1R
DIV28_2	mm9	16694	29209	57.15	18869	282	1245.79	734254	DQ539915	31.167	84.43	49.62	DIV28.2F, DIV28.2R
DIV28_3	mm9	16381	29209	56.08	18614	265	1155.42	617377	DQ539915	28.047	84.14	49.56	DIV28.3F, DIV28.3R
DIV28_4	mm9	16839	29209	57.65	18999	284.69	1249.99	709841	DQ539915	31.403	84.18	49.82	DIV28.4F, DIV28.4R
